# Supplementary material
Source: PubMed Central journal article supplement (PMC2753404)
Supplement: NIHMS122093-supplement-1_si_001.pdf [file NIHMS122093-supplement-1_si_001.pdf]

**Stereospecific Formation of the (*R*)- $\gamma$ -Hydroxytrimethylene Interstrand  $N^2$ -dG: $N^2$ -dG DNA Cross-Links Arising from the  $\gamma$ -OH-1, $N^2$ -Propano-2'-deoxyguanosine Adduct in the 5' -CpG-3' Sequence**

**Supporting Information Available**

Hai Huang, Hye-Young Kim, Ivan D. Kozekov, Young-Jin Cho, Hao Wang, Albena Kozekova, Thomas H. Harris, Carmelo J. Rizzo, and Michael P. Stone\*

Department of Chemistry and Center in Molecular Toxicology, Vanderbilt University,  
Nashville, Tennessee 37235

\*To whom correspondence should be addressed

Telephone 615-322-3589

FAX 615-322-7591

Email: michael.p.stone@vanderbilt.edu

**Table S1.** NOEs Used in the Molecular Dynamics Simulations and the Corresponding Atom Distances in the Average Structure.

| NOE                                    | relative intensity <sup>a</sup> | distance (Å) |
|----------------------------------------|---------------------------------|--------------|
| $Y^{19} N^2H \rightarrow H^{\alpha 1}$ | w                               | 3.8          |
| $Y^{19} N^2H \rightarrow H^{\alpha 2}$ | w                               | 4.2          |
| $Y^{19} N^2H \rightarrow H^{\beta 1}$  | m                               | 3.6          |
| $Y^{19} N^2H \rightarrow H^{\beta 2}$  | s                               | 2.5          |
| $Y^{19} N^2H \rightarrow H^{\gamma}$   | m                               | 3.0          |
| $Y^{19} N^2H \rightarrow X^7 N1H$      | m                               | 3.5          |
| $X^7 N^2H \rightarrow A^8 H1'$         | w                               | 5.5          |
| $X^7 N^2H \rightarrow A^8 H2$          | m                               | 3.0          |
| $X^7 N^2H \rightarrow T^{17} N3H$      | w                               | 4.6          |
| $X^7 N^2H \rightarrow C^{18} H1'$      | w                               | 3.9          |
| $X^7 N^2H \rightarrow C^{18} N^4H1$    | w                               | 5.8          |
| $X^7 N^2H \rightarrow Y^{19} H1'$      | w                               | 6.0          |
| $X^7 N^2H \rightarrow Y^{19} N1H$      | m                               | 3.4          |
| $X^7 N^2H \rightarrow Y^{19} N^2H$     | m                               | 3.0          |
| $X^7 N^2H \rightarrow H^{\alpha 1}$    | s                               | 2.9          |
| $X^7 N^2H \rightarrow H^{\alpha 2}$    | s                               | 2.3          |
| $X^7 N^2H \rightarrow H^{\beta 1}$     | w                               | 4.0          |
| $X^7 N^2H \rightarrow H^{\beta 2}$     | m                               | 3.5          |
| $X^7 N^2H \rightarrow H^{\gamma}$      | m                               | 3.6          |

<sup>a</sup> Relative intensities: s, strong; m, medium; w, weak.

**Complete references 60 and 61.**

60. Case, D. A.; Darden, T. A.; Cheatham III, T. E.; Simmerling, C. L.; Wang, J.; Duke, R. E.; Luo, R.; Merz, K. M.; Pearlman, D. A.; Crowley, M.; Walker, R. C.; Zhang, W.; Wang, B.; Hayik, S.; Roitberg, A.; Seabra, G.; Wong, K. F.; Paesani, F.; Wu, X.; Brozell, S.; Tsui, V.; Gohlke, H.; Yang, L.; Tan, C.; Mongan, J.; Hornak, V.; Cui, G.; Berroza, P.; Mathews, D. H.; Schafmeister, C.; Ross, W. S.; Kollman, P. A.; AMBER 9; University of California, San Francisco: San Francisco, 2006.
61. Frisch, M. J.; Trucks, G. W.; Schlegel, H. B.; Scuseria, G. E.; Robb, M. A.; Cheeseman, J. R.; Montgomery, J. A.; Vreven, T.; Kudin, K. N.; Burant, J. C.; Millam, J. M.; Iyengar, S. S.; Tomasi, J.; Barone, V.; Mennucci, B.; Cossi, M.; Scalmani, G.; Rega, N.; Petersson, G. A.; Nakatsuji, H.; Hada, M.; Ehara, M.; Toyota, K.; Fukuda, R.; Hasegawa, J.; Ishida, M.; Nakajima, T.; Honda, Y.; Kitao, O.; Nakai, H.; Klene, M.; Li, X.; Knox, J. E.; Hratchian, H. P.; Cross, J. B.; Adamo, C.; Jaramillo, J.; Gomperts, R.; Stratmann, R. E.; Yazyev, O.; Austin, A. J.; Cammi, R.; Pomelli, C.; Pomelli, J.; Ochterski, W.; Ayala, P. Y.; Morokuma, K.; Voth, G. A.; Salvador, P.; Dannenberg, J. J.; Zakrzewska, V. G.; Daniels, A. D.; Farkas, O.; Rabuck, A. D.; Raghavachari, K.; Ortiz, J. V. GAUSSIAN 03; Gaussian, Inc., Wallingford, CT, 2004.
